# Supplementary material for: Simultaneous Identification of Functional Antigen-Specific CD8+ and CD4+ Cells after In Vitro Expansion Using Elongated Peptides
Source: MDPI journal article supplement (doi:10.3390/cells11213451), 2022-10-31
Supplement: s1 [file cells-1933277-SM.pdf › cells-1933277-SM.pdf]

# Supplementary Material

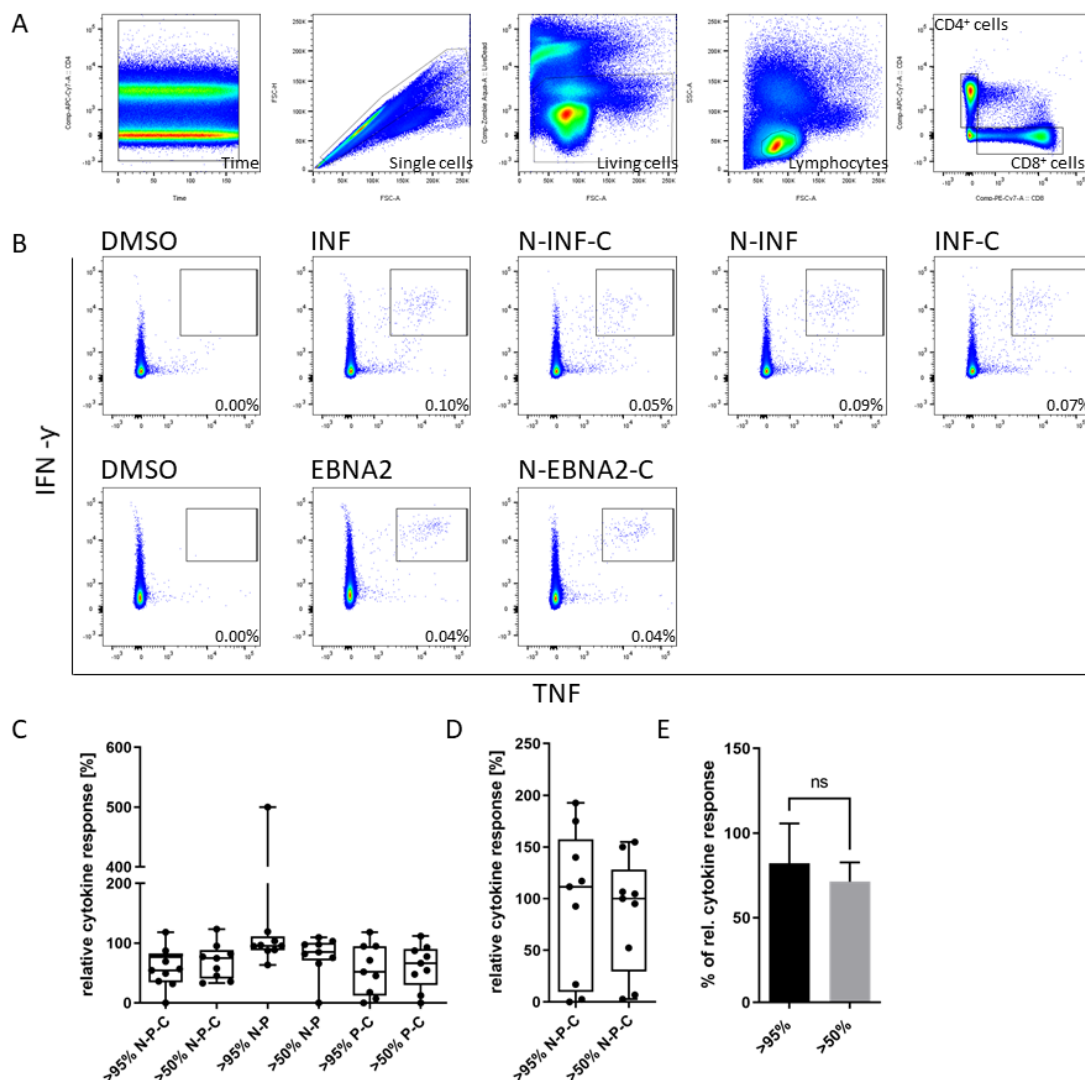

**Figure S1.** Gating strategy, exemplary dot plots and pooled results for the ex vivo ICS with comparison of the relative cytokine response after stimulation using two EP purities. **(A)** Gating strategy from left to right: time, single cells, living cells, and lymphocytes, which were further gated for their CD8 or CD4 coreceptor expression. **(B)** Exemplary results for the IFN- $\gamma$  and TNF coexpression in CD8<sup>+</sup> cells (upper row; Healthy donor 6 (HD6)) and CD4<sup>+</sup> cells (lower row, HD5) after stimulation with DMSO (10% in water; negative control) or viral-derived peptides from the Influenza (INF) and EBV (EBNA2) viruses of short and elongated length (20 mers, N-peptide source-C: N- and C-terminal elongated; N- peptide source: N-terminal elongated; peptide source-C: C-terminal elongated). Percentages indicate IFN- $\gamma$ <sup>+</sup> TNF<sup>+</sup> cells within the CD4<sup>+</sup>/CD8<sup>+</sup> cell populations. **(C/D)** Box and whisker plots show pooled data from Figure 1A for CD8<sup>+</sup> T cells (C) and from Figure 1B for CD4<sup>+</sup> T cells (D); min to max values and lines indicate medians. **(E)** Median with 95% CI of the percentage of cytokine response after EP stimulation related to the short peptide, which is normalized to 100%. Two EP purities, >50 and  $\geq$ 90%, were used.  $n = 36$  donor/peptide (HLA-class I and -class II) combinations per purity. Statistical test: Mann-Whitney test, ns = not significant.

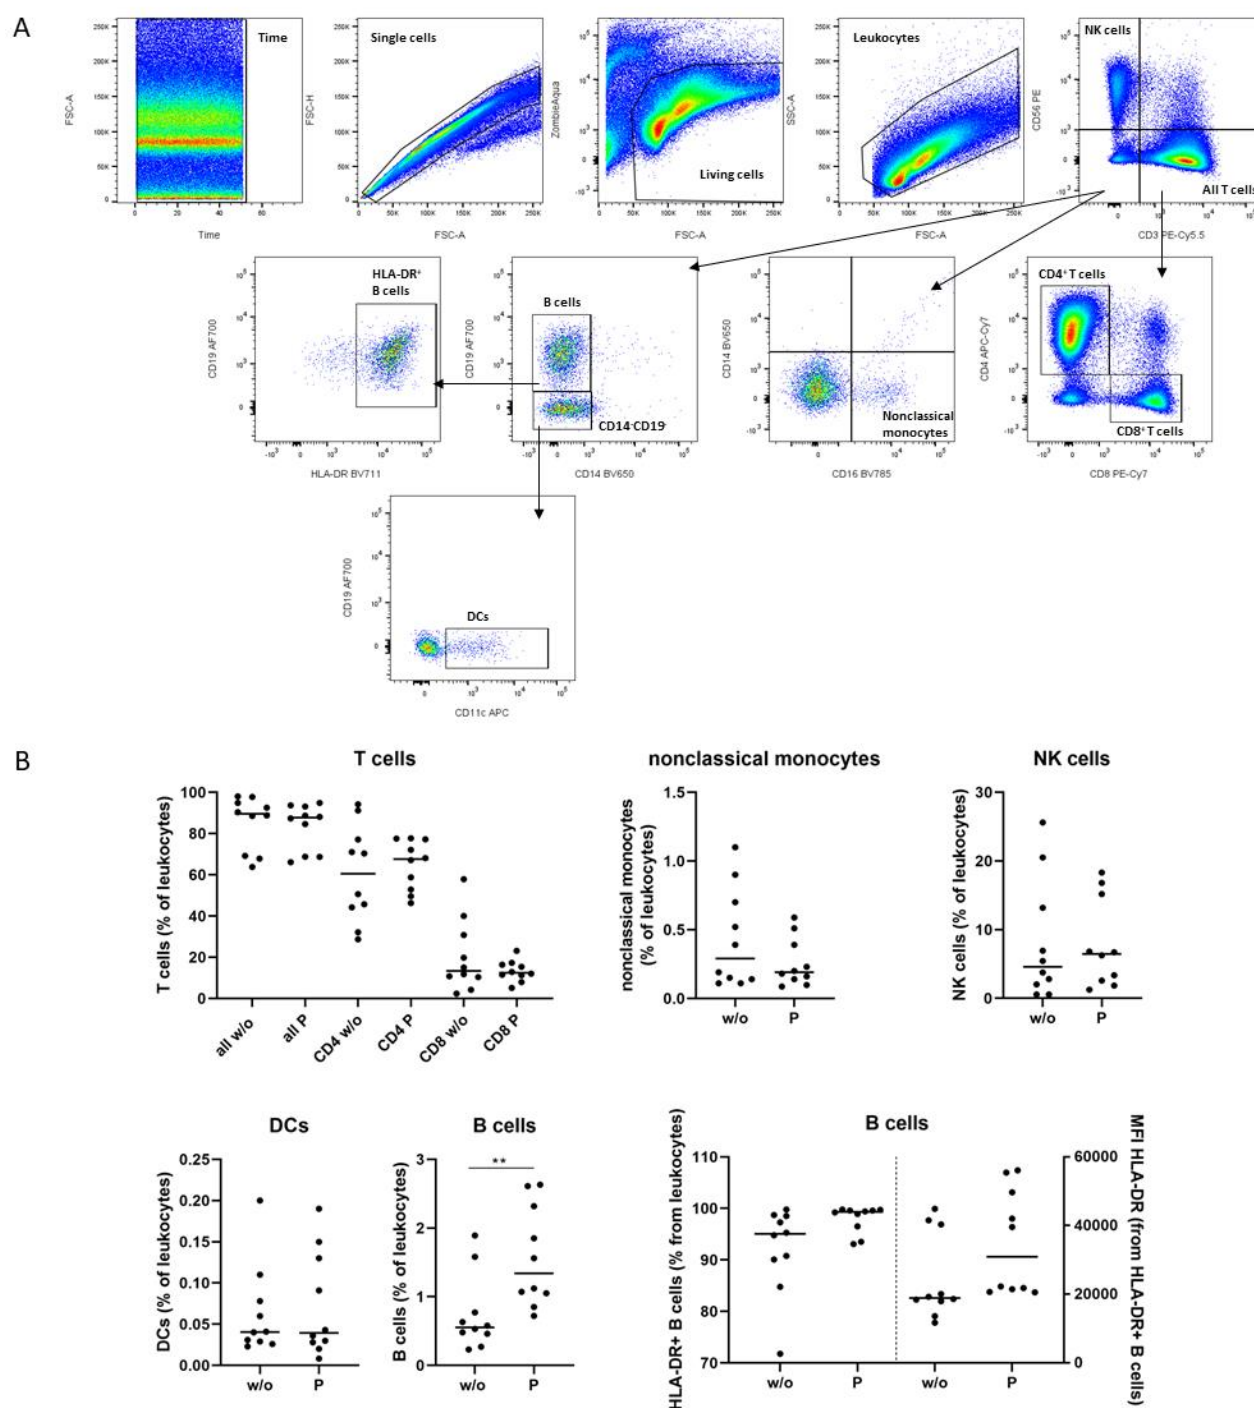

**Figure S2.** Immune cell populations detected with or without addition of Poly-ICLC during T-cell expansion. PBMCs from 4 HDs were stimulated with virus-derived peptides and with (P) or without (w/o) 20  $\mu$ g Poly-ICLC added on day 1 of the in vitro culture. On day 12, cells were harvested and 500,000 cells were stained to identify immune cell subsets. **(A)** Gating strategy from left to right: time, single cells, living cells, and leukocytes. Leukocytes were further gated for NK cells (CD3<sup>-</sup>CD56<sup>+</sup>) and T cells (CD3<sup>+</sup>CD56<sup>-</sup>). T cells were subsequently gated for CD4<sup>+</sup> T cells (CD3<sup>+</sup>CD56<sup>-</sup>CD4<sup>+</sup>) and CD8<sup>+</sup> T cells (CD3<sup>+</sup>CD56<sup>-</sup>CD8<sup>+</sup>). CD56<sup>-</sup> and CD3<sup>-</sup> cells were gated for non-classical monocytes (CD3<sup>-</sup>CD56<sup>-</sup>CD14<sup>+</sup>CD16<sup>+</sup>) and B cells (CD3<sup>-</sup>CD56<sup>-</sup>CD14<sup>+</sup>CD19<sup>+</sup>). CD14<sup>-</sup> and CD19<sup>-</sup> cells were analyzed for DCs (CD3<sup>-</sup>CD56<sup>-</sup>CD19<sup>+</sup>CD14<sup>+</sup>CD11c<sup>+</sup>). **(B)** Scatter-plot graphs show the frequency of the various immune cell subsets. **(C)** HLA-DR expression within B cells (left Y-axis) and corresponding HLA-DR median fluorescence (MFI) (right Y-axis). Each point represents one test condition and bars indicate medians. Statistical analysis: Mann-Whitney test. \*\*  $p < 0.01$ .

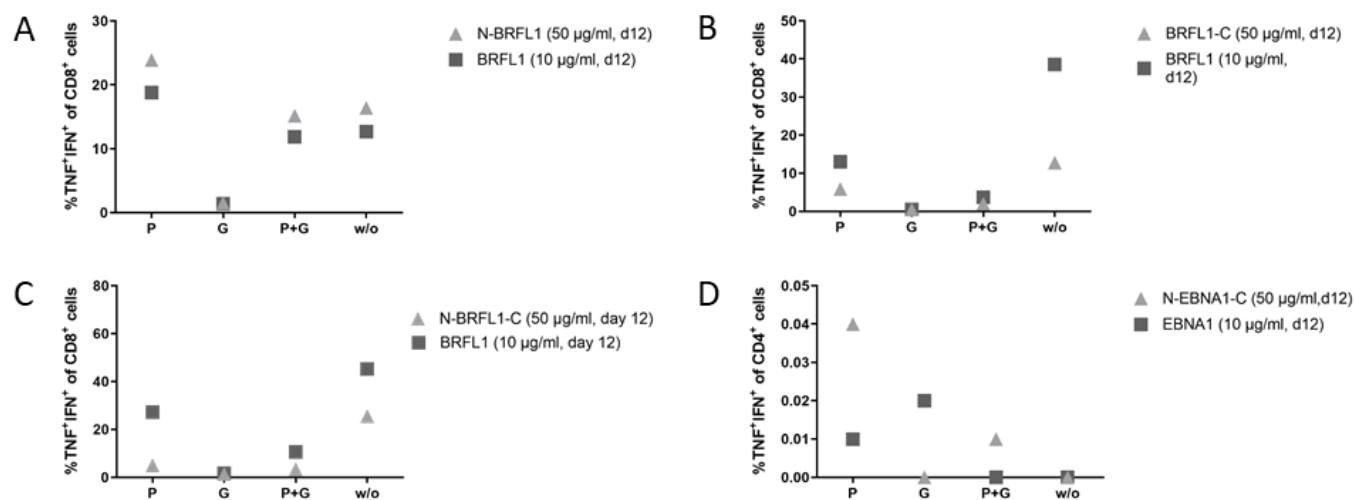

**Figure S3.** The single addition of Poly-ICLC is superior to the combination of Poly-ICLC and GM-CSF for the detection of viral-specific CD4<sup>+</sup> and CD8<sup>+</sup> T cells using EPs. PBMCs were stimulated with virus-derived HLA-class I and HLA-class II EPs (10 µg/mL of the 20 mers, N- and/or -C-terminal elongations are indicated) on day 1. In addition to the peptide stimulation on day 1, Poly-ICLC (20 µg/mL, P), GM-CSF (0.8 µg/mL, G), or the combination of P + G (same concentration as for the single addition) were added. Control stimulation was performed with peptide only (w/o). (A–D) ICS results. Cells were re-stimulated on day 12 with 10 µg/mL short peptide or 50 µg/mL of the respective EP. Specific frequencies (background subtracted) of cytokine (IFN $\gamma$ <sup>+</sup>TNF<sup>+</sup>) CD8<sup>+</sup> (HD5; A–C) or CD4<sup>+</sup> (HD6, D) cells are shown relative to the responses against the matched short peptides. Absolute frequencies with short peptide stimulation: 16.2% IFN $\gamma$ <sup>+</sup>TNF<sup>+</sup>CD8<sup>+</sup> (INF); 0.85% IFN $\gamma$ <sup>+</sup>TNF<sup>+</sup>CD4<sup>+</sup> (CMV). Full gating strategy is depicted in Figure S1A,B.

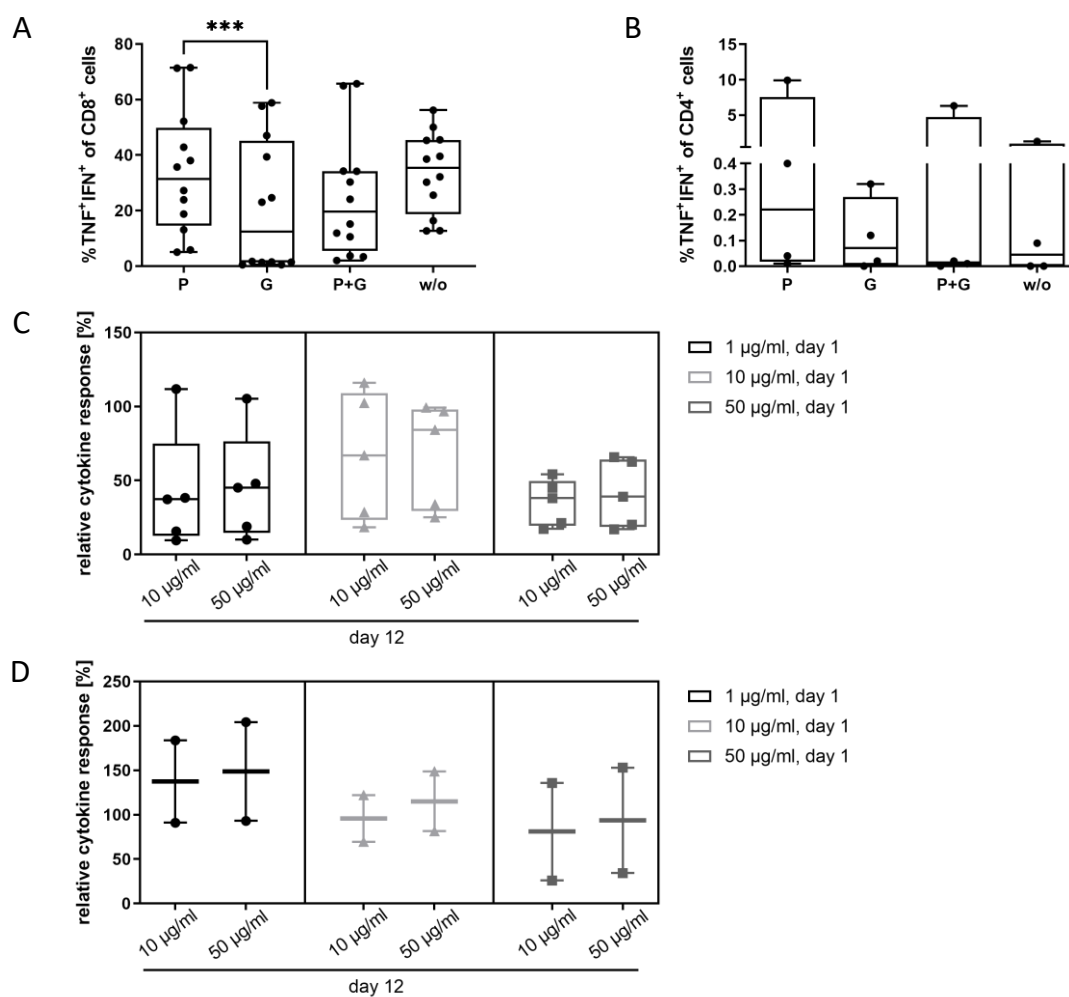

**Figure S4.** The addition of Poly-ICLC and an increased EP concentration allows the simultaneous amplification of antigen-specific CD8<sup>+</sup> and CD4<sup>+</sup> T cells and their detection in ICS. **(A/B)** Box and whisker plots show the pooled data from Figure 3C–E and Figure S3A–C for CD8<sup>+</sup> T cells **(A)** and Figure 3F and Figure S3D for CD4<sup>+</sup> T cells **(B)**. Stimulation conditions: EPs + Poly-ICLC (P), GM-CSF (G), the combination of Poly-ICLC and GM-CSF (P + G) or without addition (w/o). Lines indicate medians. Statistics: Friedman test. \*\*\*  $p < 0.001$  **(C/D)** Min to Max plots showing the pooled data for the stimulation of the cells with EPs on day 1 and day 12 of the in vitro culture of Figure 4A–C and Figure S5A/B for CD8<sup>+</sup> T cells **(C)** and Figure 4D and Figure S5C for CD4<sup>+</sup> T cells **(D)**. Min to max values and lines indicate the medians.

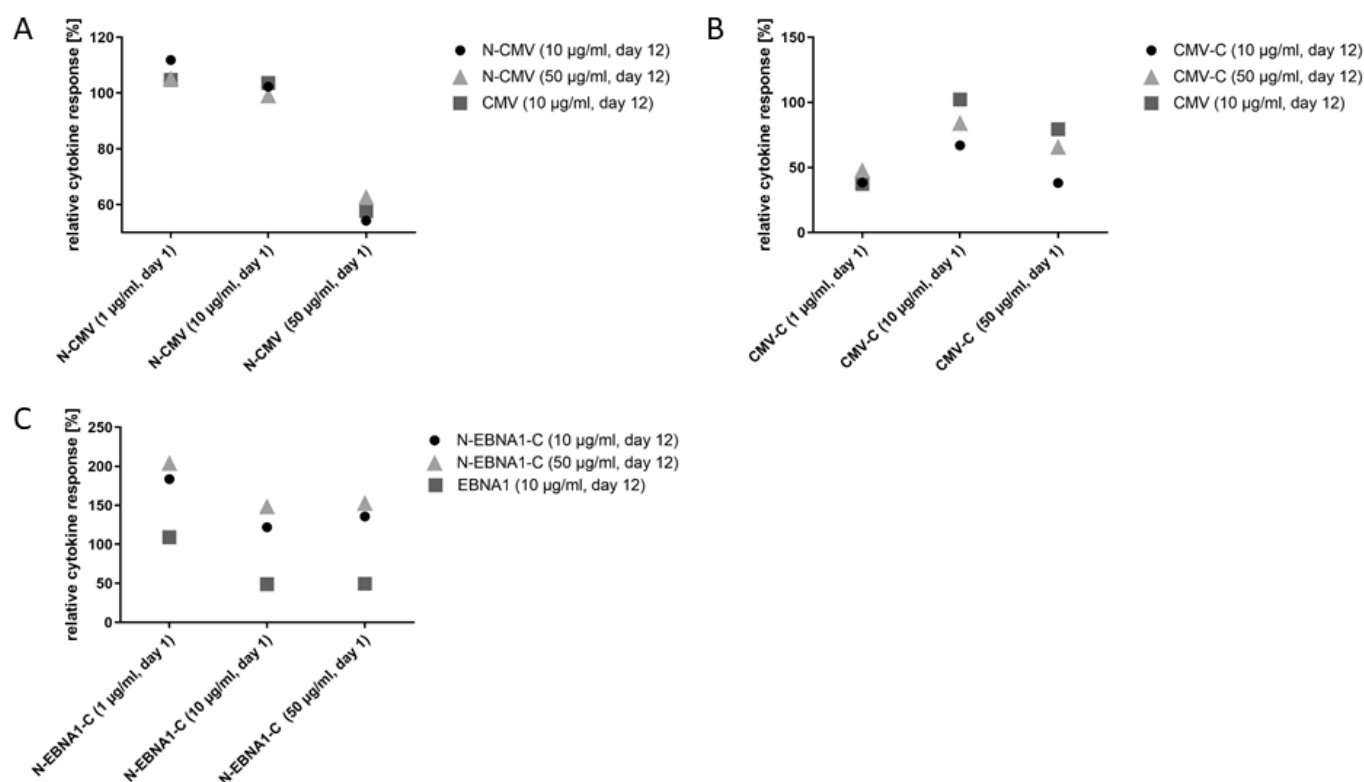

**Figure S5.** Identification of the optimal EP concentration for the read-out of functional virus-specific CD8<sup>+</sup> and CD4<sup>+</sup> cells after in vitro expansion. PBMCs were cultured with CMV- or EBV-derived short peptides or matched EPs (20 mers, N- and/or -C-terminal elongations are indicated) for 12 days. On day 1, cells were stimulated with 1 µg/mL (HLA-class I) or 5 µg/mL (HLA-class II) short peptides (standard concentrations) or with 1, 10, or 50 µg/mL of the EP plus the addition of 20 µg/mL Poly-ICLC (*x*-axis). On day 12, cells were re-stimulated with 10 µg/mL of the short peptide or with 10 or 50 µg/mL of the respective EP before ICS analysis. Single live CD8<sup>+</sup> or CD4<sup>+</sup> lymphocytes were analyzed for their specific IFN- $\gamma$  and TNF expression (percentage of IFN- $\gamma$ <sup>+</sup>TNF<sup>+</sup> cells; background of the negative control was subtracted). The percentages of double positive cytokine CD8<sup>+</sup> cells (A/B, donor (HD2) or CD4<sup>+</sup> cells (C, HD10) relative to the cytokine response detected by the standard protocol (cells stimulated with the short peptide on day 1 (1/5 µg/mL) and on day 12 (10 µg/mL)) are shown. Absolute frequencies with short peptide stimulation: 58.7% IFN- $\gamma$ <sup>+</sup>TNF<sup>+</sup> CD8<sup>+</sup> (CMV); 6.4% IFN- $\gamma$ <sup>+</sup>TNF<sup>+</sup> CD4<sup>+</sup> (EBV EBNA2).

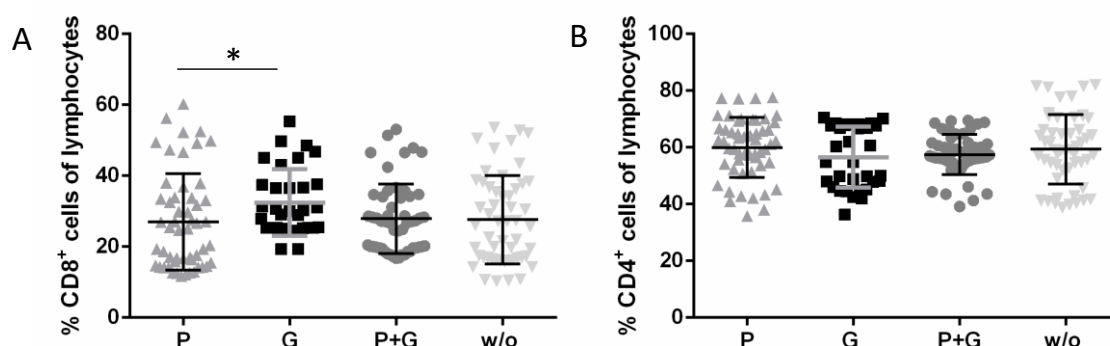

**Figure S6.** The single addition of Poly-ICLC during T cell expansion does not alter the CD8<sup>+</sup> (A) and CD4<sup>+</sup> (B) cell frequencies. On day 1 of the 12-day in vitro culture, PBMCs were stimulated with virus-derived peptides of short length or with their respective EP version (HLA-class I restricted epitopes derived from EBV BRFL1 and Influenza virus: N- and C-terminal, N-terminal, and C-terminal elongated; HLA-class II restricted epitopes derived from EBV EBNA1 and CMV: N- and C-terminal). In addition to the peptide stimulation, Poly-ICLC (20 µg/mL, P), GM-CSF (0.8 µg/mL, G),

or the combination of P + G (same concentration as for the single addition) or no addition (w/o) was tested. On day 12, cells were re-stimulated with 10 µg/mL of the short peptide, 50 µg/mL of the respective elongated version, or left unstimulated (10% DMSO), then ICS was performed. Frequencies of CD4<sup>+</sup> and CD8<sup>+</sup> cells within living lymphocytes are shown. *n* = 7 donors (except GM-CSF alone: *n* = 4 donors), *n* = 2 tests per donor and condition (short peptide) and *n* = 3 tests per donor and condition (EP). Statistical analysis: Kruskal-Wallis test with Dunn's multiple comparison post-test. \* *p* ≤ 0.05.

**Table S1.** Monoclonal antibody panel for the detection of immune cell subsets.

|                        | Marker    | Fluorochrome | Clone        | Manufacturer                    | Cat. No.   |
|------------------------|-----------|--------------|--------------|---------------------------------|------------|
| Extracellular staining | Live/Dead | Zombie Aqua  | -            | BioLegend, San Diego, CA, USA   | 423102     |
|                        | CD3       | PE-Cy5.5     | SK7          | eBioscience, San Diego, CA, USA | 35-0036-42 |
|                        | CD4       | APC-Cy7      | RPA-T4       | BD, Heidelberg, Germany         | 557871     |
|                        | CD8       | PE-Cy7       | SFCI21Thy2D3 | BeckmanCoulter, Brea, CA, USA   | 737661     |
|                        | CD11c     | APC          | 3.9          | BioLegend                       | 301613     |
|                        | CD14      | BV650        | M5E2         | BioLegend                       | 301835     |
|                        | CD16      | BV786        | B73.1        | BioLegend                       | 360734     |
|                        | CD19      | AF700        | HIB19        | BD                              | 561031     |
|                        | CD56      | PE           | B159         | BD                              | 555516     |
|                        | HLA-DR    | BV711        | G46-6        | BD                              | 563696     |

**Table S2.** Absolute percentages of IFN-γ<sup>+</sup>TNF<sup>+</sup> CD8<sup>+</sup> and CD4<sup>+</sup> cells after short peptide or EP stimulation detected in ex vivo ICS (Figure 1).

| Peptide Source (HLA-Class Restriction) | Healthy Donor (HD) | Peptide (Sequence)             | Peptide Purity | Absolute IFN-γ <sup>+</sup> TNF <sup>+</sup> Double Positive Cytokine Response (Background Subtracted)* |
|----------------------------------------|--------------------|--------------------------------|----------------|---------------------------------------------------------------------------------------------------------|
| CMV (HLA-class I)                      | HD1                | CMV (NLVPMVATV)                | >95%           | 2.29%                                                                                                   |
|                                        |                    | N-CMV-C (GILARNLVPMVATVQGQNLK) | >90%           | 1.59%                                                                                                   |
|                                        |                    | N-CMV-C (GILARNLVPMVATVQGQNLK) | >50%           | 1.71%                                                                                                   |
|                                        |                    | N-CMV (WPPWQAGILARNLVPMVATV)   | >90%           | 2.19%                                                                                                   |
|                                        |                    | N-CMV (WPPWQAGILARNLVPMVATV)   | >50%           | 2.24%                                                                                                   |
|                                        |                    | CMV-C (NLVPMVATVQGQNLKYQEFF)   | >90%           | 2.17%                                                                                                   |
|                                        |                    | CMV-C (NLVPMVATVQGQNLKYQEFF)   | >50%           | 2.13%                                                                                                   |
|                                        |                    | CMV (NLVPMVATV)                | >95%           | 0.40%                                                                                                   |
|                                        | HD2                | N-CMV-C (GILARNLVPMVATVQGQNLK) | >90%           | 0.35%                                                                                                   |
|                                        |                    | N-CMV-C (GILARNLVPMVATVQGQNLK) | >50%           | 0.33%                                                                                                   |
|                                        |                    | N-CMV (WPPWQAGILARNLVPMVATV)   | >90%           | 0.38%                                                                                                   |
|                                        |                    | N-CMV (WPPWQAGILARNLVPMVATV)   | >50%           | 0.39%                                                                                                   |
|                                        |                    | CMV-C (NLVPMVATVQGQNLKYQEFF)   | >90%           | 0.38%                                                                                                   |
|                                        |                    | CMV-C (NLVPMVATVQGQNLKYQEFF)   | >50%           | 0.35%                                                                                                   |
|                                        |                    | CMV (NLVPMVATV)                | >95%           | 2.22%                                                                                                   |
|                                        |                    | N-CMV-C (GILARNLVPMVATVQGQNLK) | >90%           | 2.63%                                                                                                   |
|                                        | HD3                | N-CMV-C (GILARNLVPMVATVQGQNLK) | >50%           | 2.74%                                                                                                   |
|                                        |                    | N-CMV (WPPWQAGILARNLVPMVATV)   | >90%           | 2.30%                                                                                                   |
|                                        |                    | N-CMV (WPPWQAGILARNLVPMVATV)   | >50%           | 2.29%                                                                                                   |

|                             |     |                                  |      |       |
|-----------------------------|-----|----------------------------------|------|-------|
| EBV<br>(HLA-class I)        |     | CMV-C (NLVPMVATVQGQNLKYQEFF)     | >90% | 2.63% |
|                             |     | CMV-C (NLVPMVATVQGQNLKYQEFF)     | >50% | 2.48% |
|                             | HD1 | BRFL1 (YVLDHLIVV)                | 86%  | 0.06% |
|                             |     | N-BRFL1-C (PIVMRYVLDHLIVVTDRFFI) | >90% | 0.00% |
|                             |     | N-BRFL1-C (PIVMRYVLDHLIVVTDRFFI) | >50% | 0.02% |
|                             |     | N-BRFL1 (ACSIACPIVMRYVLDHLIVV)   | >90% | 0.30% |
|                             |     | N-BRFL1 (ACSIACPIVMRYVLDHLIVV)   | >50% | 0.00% |
|                             |     | BRFL1-C (YVLDHLIVVTDRFFIQAPSN)   | >90% | 0.00% |
|                             |     | BRFL1-C (YVLDHLIVVTDRFFIQAPSN)   | >50% | 0.00% |
|                             | HD4 | BRFL1 (YVLDHLIVV)                | 86%  | 0.21% |
|                             |     | N-BRFL1-C (PIVMRYVLDHLIVVTDRFFI) | >90% | 0.12% |
|                             |     | N-BRFL1-C (PIVMRYVLDHLIVVTDRFFI) | >50% | 0.20% |
|                             |     | N-BRFL1 (ACSIACPIVMRYVLDHLIVV)   | >90% | 0.25% |
|                             |     | N-BRFL1 (ACSIACPIVMRYVLDHLIVV)   | >50% | 0.23% |
|                             |     | BRFL1-C (YVLDHLIVVTDRFFIQAPSN)   | >90% | 0.04% |
|                             |     | BRFL1-C (YVLDHLIVVTDRFFIQAPSN)   | >50% | 0.14% |
|                             | HD5 | BRFL1 (YVLDHLIVV)                | 86%  | 0.18% |
|                             |     | N-BRFL1-C (PIVMRYVLDHLIVVTDRFFI) | >90% | 0.06% |
|                             |     | N-BRFL1-C (PIVMRYVLDHLIVVTDRFFI) | >50% | 0.14% |
|                             |     | N-BRFL1 (ACSIACPIVMRYVLDHLIVV)   | >90% | 0.16% |
|                             |     | N-BRFL1 (ACSIACPIVMRYVLDHLIVV)   | >50% | 0.12% |
|                             |     | BRFL1-C (YVLDHLIVVTDRFFIQAPSN)   | >90% | 0.01% |
|                             |     | BRFL1-C (YVLDHLIVVTDRFFIQAPSN)   | >50% | 0.09% |
| INF<br>(HLA-class I)        | HD1 | INF (GILGFVFTL)                  | 100% | 0.73% |
|                             |     | N-INF-C (SPLTKGILGFVFTLTVPSE)    | >90% | 0.36% |
|                             |     | N-INF-C (SPLTKGILGFVFTLTVPSE)    | >50% | 0.26% |
|                             |     | N-INF (KTRPILSPLTKGILGFVFTL)     | >90% | 0.64% |
|                             |     | N-INF (KTRPILSPLTKGILGFVFTL)     | >50% | 0.62% |
|                             |     | INF-C (GILGFVFTLTVPSEGLQRR)      | >90% | 0.38% |
|                             |     | INF-C (GILGFVFTLTVPSEGLQRR)      | >50% | 0.09% |
|                             | HD6 | INF (GILGFVFTL)                  | 100% | 0.09% |
|                             |     | N-INF-C (SPLTKGILGFVFTLTVPSE)    | >90% | 0.05% |
|                             |     | N-INF-C (SPLTKGILGFVFTLTVPSE)    | >50% | 0.05% |
|                             |     | N-INF (KTRPILSPLTKGILGFVFTL)     | >90% | 0.09% |
|                             |     | N-INF (KTRPILSPLTKGILGFVFTL)     | >50% | 0.07% |
|                             |     | INF-C (GILGFVFTLTVPSEGLQRR)      | >90% | 0.07% |
|                             |     | INF-C (GILGFVFTLTVPSEGLQRR)      | >50% | 0.07% |
|                             | HD3 | INF (GILGFVFTL)                  | 100% | 0.11% |
|                             |     | N-INF-C (SPLTKGILGFVFTLTVPSE)    | >90% | 0.04% |
|                             |     | N-INF-C (SPLTKGILGFVFTLTVPSE)    | >50% | 0.05% |
|                             |     | N-INF (KTRPILSPLTKGILGFVFTL)     | >90% | 0.07% |
|                             |     | N-INF (KTRPILSPLTKGILGFVFTL)     | >50% | 0.09% |
|                             |     | INF-C (GILGFVFTLTVPSEGLQRR)      | >90% | 0.05% |
|                             |     | INF-C (GILGFVFTLTVPSEGLQRR)      | >50% | 0.06% |
| EBV EBNA2<br>(HLA-class II) | HD3 | EBNA2 (PRSPVTFYNIPPMPL)          | 81%  | 0.01% |
|                             |     | N-EBNA2-C (SPEPRSPVTFYNIPPMPLPP) | >90% | 0.02% |
|                             |     | N-EBNA2-C (SPEPRSPVTFYNIPPMPLPP) | >50% | 0.02% |
|                             | HD7 | EBNA2 (PRSPVTFYNIPPMPL)          | 81%  | 0.02% |
|                             |     | N-EBNA2-C (SPEPRSPVTFYNIPPMPLPP) | >90% | 0.02% |

|                             |     |                                  |      |       |
|-----------------------------|-----|----------------------------------|------|-------|
| CMV<br>(HLA-class II)       | HD5 | N-EBNA2-C (SPEPRSPTVFYNIPPMPLPP) | >50% | 0.02% |
|                             |     | EBNA2 (PRSPTVFYNIPPMPL)          | 81%  | 0.04% |
|                             |     | N-EBNA2-C (SPEPRSPTVFYNIPPMPLPP) | >90% | 0.04% |
|                             |     | N-EBNA2-C (SPEPRSPTVFYNIPPMPLPP) | >50% | 0.04% |
|                             | HD1 | CMV (YQEFFWDANDIYRIF)            | 95%  | 0.18% |
|                             |     | N-CMV-C (NLKYQEFFWDANDIYRIFAE)   | >90% | 0.21% |
|                             |     | N-CMV-C (NLKYQEFFWDANDIYRIFAE)   | >50% | 0.18% |
|                             | HD2 | CMV (YQEFFWDANDIYRIF)            | 95%  | 0.09% |
|                             |     | N-CMV-C (NLKYQEFFWDANDIYRIFAE)   | >90% | 0.10% |
|                             |     | N-CMV-C (NLKYQEFFWDANDIYRIFAE)   | >50% | 0.09% |
|                             | HD4 | CMV (YQEFFWDANDIYRIF)            | 95%  | 0.07% |
|                             |     | N-CMV-C (NLKYQEFFWDANDIYRIFAE)   | >90% | 0.01% |
|                             |     | N-CMV-C (NLKYQEFFWDANDIYRIFAE)   | >50% | 0.03% |
| EBV EBNA1<br>(HLA-class II) | HD6 | EBNA1 (KTSLYNLRRGTALA)           | 72%  | 0.01% |
|                             |     | N-EBNA1-C (GGSKTSLYNLRRGTALAIPQ) | >90% | 0.00% |
|                             |     | N-EBNA1-C (GGSKTSLYNLRRGTALAIPQ) | >50% | 0.00% |
|                             | HD2 | EBNA1 (KTSLYNLRRGTALA)           | 72%  | 0.01% |
|                             |     | N-EBNA1-C (GGSKTSLYNLRRGTALAIPQ) | >90% | 0.01% |
|                             |     | N-EBNA1-C (GGSKTSLYNLRRGTALAIPQ) | >50% | 0.01% |
|                             | HD4 | EBNA1 (KTSLYNLRRGTALA)           | 72%  | 0.09% |
|                             |     | N-EBNA1-C (GGSKTSLYNLRRGTALAIPQ) | >90% | 0.00% |
|                             |     | N-EBNA1-C (GGSKTSLYNLRRGTALAIPQ) | >50% | 0.01% |

\* background cytokine production in the negative control was subtracted.
